# Supplementary figures and images for: Early IgE Production Is Linked with Extrafollicular B- and T-Cell Activation in Low-Dose Allergy Model
Source: MDPI journal article supplement (doi:10.3390/vaccines10060969), 2022-06-17

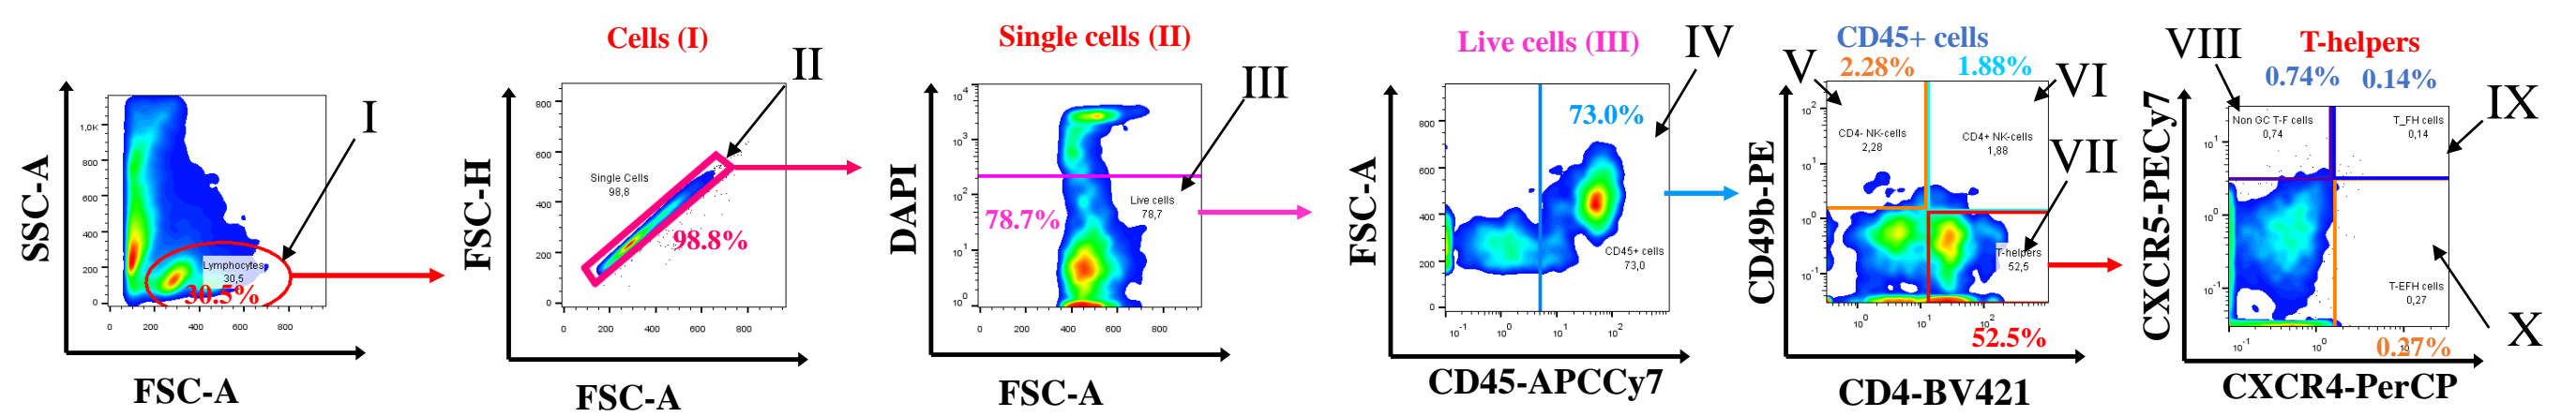

**Figure S2**

Supplement: s1 [file s1]

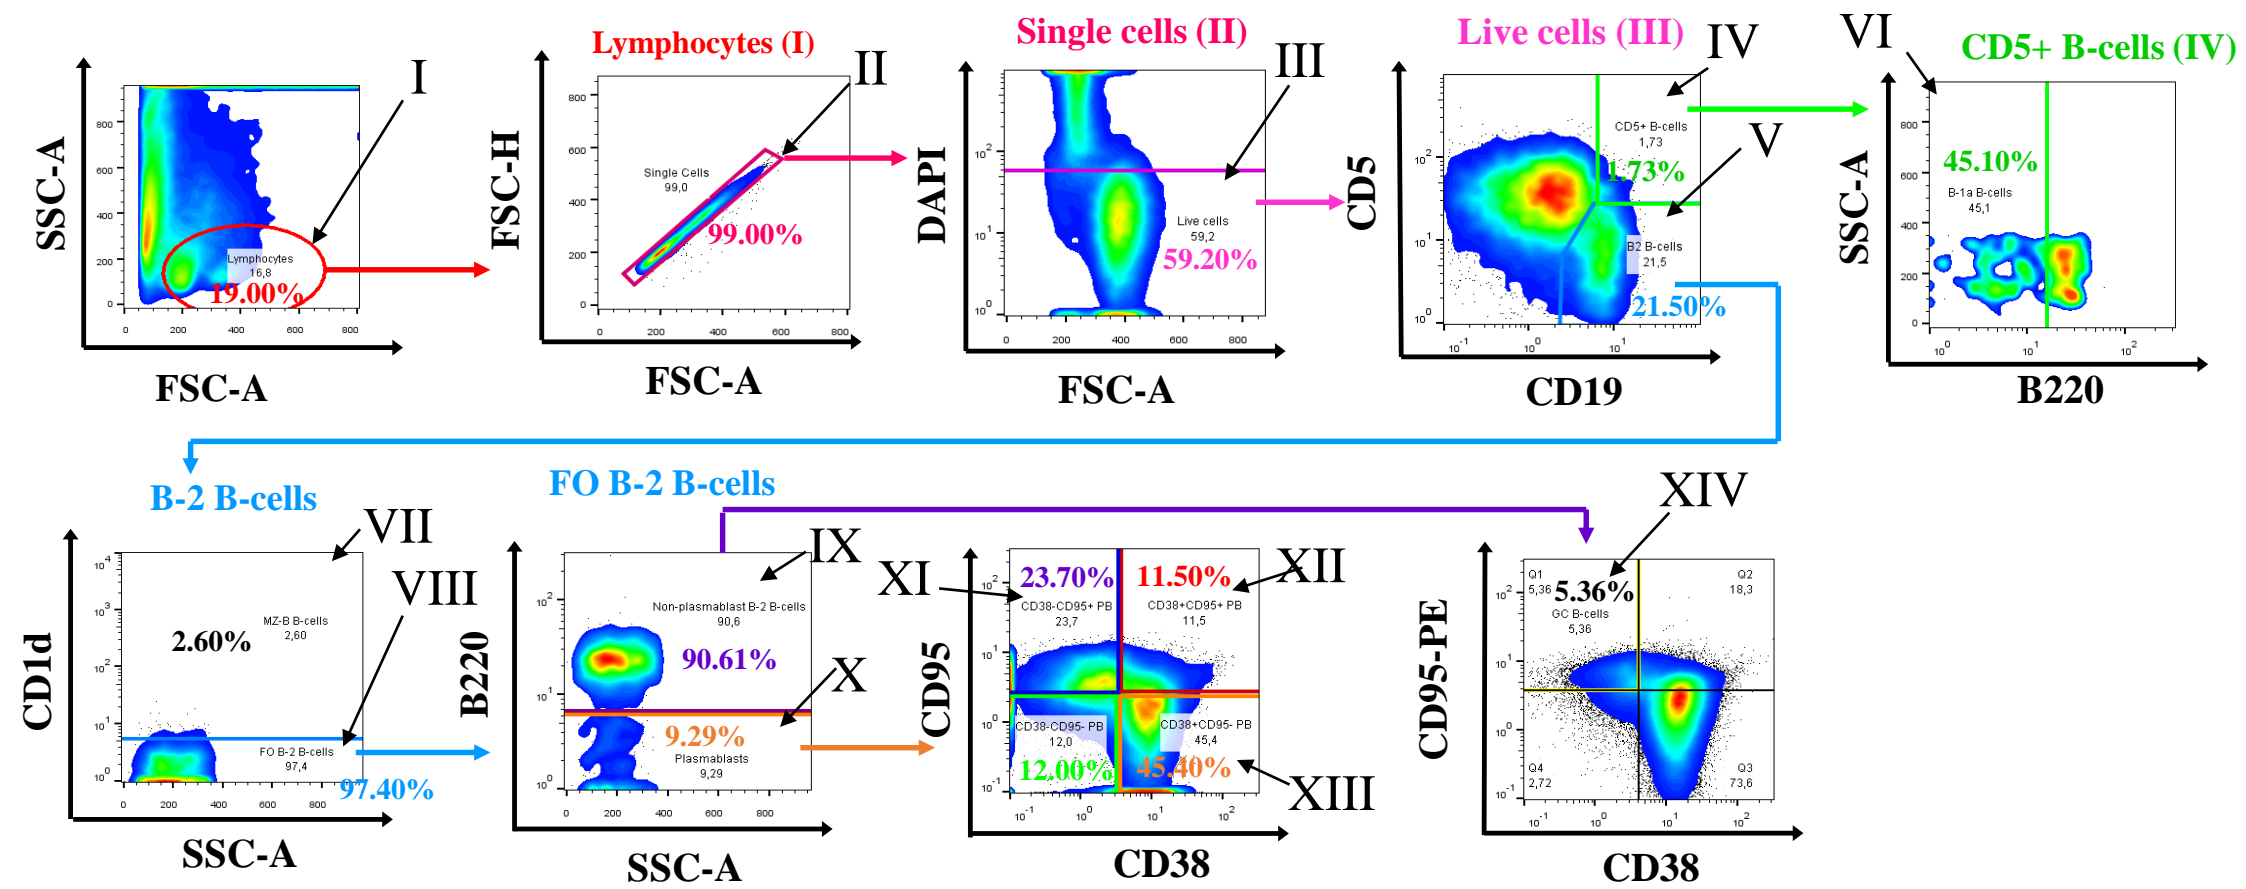

**Figure S1**

Supplement: s1 [file s1]
